# Supplementary material for: The co-receptor Tetraspanin12 directly captures Norrin to promote ligand-specific β-catenin signaling
Source: eLife. 2025 Jan 2;13:RP96743. doi: 10.7554/eLife.96743 (PMC11695057; doi:10.7554/eLife.96743)
Supplement: Figure 1—source data 1. [file elife-96743-fig1-data1.xlsx]

## Sheet: Panel C Steady State
[Norrin] (nM)	Interference shift (%Bmax)
0.32	0.3014	1.2469	-0.9181
1	18.3987	5.7008	7.2771
3.2	42.0722	16.4839	17.6607
10	54.7252	49.6787	36.4523
32	78.2417	75.3815	71.4412
100	94.5682	94.3574	87.4501

## Sheet: Panel D Kobs
[Norrin] (nM)	TSPAN12-Norrin association Kobs (s-1)
1	0.0003706	0.001187	0.0004261
3.2	0.0004548	0.001405	0.001131
10	0.00105	0.003418	0.003079
32	0.002067	0.007581	0.008959
