# Supplementary material for: The co-receptor Tetraspanin12 directly captures Norrin to promote ligand-specific β-catenin signaling
Source: eLife. 2025 Jan 2;13:RP96743. doi: 10.7554/eLife.96743 (PMC11695057; doi:10.7554/eLife.96743)
Supplement: Figure 2—source data 1. [file elife-96743-fig2-data1.xlsx]

## Sheet: Panel E Mut Norrin
Norrin construct	WT Tspan12 binding affinity (nM)
WT	2.43	2.3	2.05
R107E/R115E	256.2	182.5	184.2
T117Y/T119Y	16.8	37.8	36.4
K102E/R121E	218.4	214.7	299.6
S82D	5.33	6.05	4.82

## Sheet: Panel F Mut Tspan12
Tspan12 construct	WT Norrin binding affinity (nM)
WT	3.14	2.39	2.38
E173K/D175K	10.75	7.92	6.89
L198Y	2.16	1.77	1.61
E196K/S199K	15.23	14.69	11.69
E170K	17.91	15.81	13.4
