# Supplementary material for: The co-receptor Tetraspanin12 directly captures Norrin to promote ligand-specific β-catenin signaling
Source: eLife. 2025 Jan 2;13:RP96743. doi: 10.7554/eLife.96743 (PMC11695057; doi:10.7554/eLife.96743)
Supplement: Figure 3—source data 1. [file elife-96743-fig3-data1.xlsx]

## Sheet: Panel B—SOS competition
[SOS] (µM)	Interference shift (% of signal at 0µM SOS)
3160	2.2592	3.8742	4.4212
1000	6.4582	5.6081	17.9017
316	29.5458	29.1953	33.8222
100	58.7911	57.9024	68.1311
31.6	89.9282	73.7612	78.6928
10	94.9671	105.851	99.3686
3.16	99.5012	103.978	100.144

## Sheet: Panel D—CRDL competition
[CRDL] (nM)	Frac Norrin bound (Beads/(Beads+Sup))
0	0.4644	0.4671	0.5237
98	0.3762	0.534	0.4725
391	0.515	0.4402	0.4302
1563	0.3972	0.425	0.3955
6250	0.3912	0.4057	0.3644
25000	0.3718	0.391	0.3343
100000	0.3757	0.3927	0.2571
