# Supplementary material for: The co-receptor Tetraspanin12 directly captures Norrin to promote ligand-specific β-catenin signaling
Source: eLife. 2025 Jan 2;13:RP96743. doi: 10.7554/eLife.96743 (PMC11695057; doi:10.7554/eLife.96743)
Supplement: Figure 4—source data 1. [file elife-96743-fig4-data1.xlsx]

## Sheet: Panel A-B Steady state binding
	Interference shift (% Bmax)
[Norrin] (nM)	TSPAN12-Norrin dimer			TSPAN12/Fzd4-Norrin dimer			Fzd4-Norrin dimer			TSPAN12-Norrin monomer			TSPAN12/Fzd4-Norrin monomer			Fzd4-Norrin monomer
0.032					0.3092	-0.4402	-2.3963	2.5963	-2.5756
0.1				6.6523	2.2114	1.7014	-0.8052	-1.4467	-0.9332
0.32	0.3014	1.2469	-0.9181	9.1112	3.5605	4.3284	1.888	1.3915	0.9179				-0.234	5.3473	15.1666	2.5077	0.6475	-0.5861
1	18.3987	5.7008	7.2771	24.0875	12.5126	24.6346	11.3832	7.0468	0.791	0.1104	0.9841	0.2814	6.5061	11.458	15.0581	-11.2197	0.5102	-0.8261
3.2	42.0722	16.4839	17.6607	65.3961	57.6373	73.3216	67.4853	39.2128	35.1899	-0.9905	-0.5451	0.0822	10.286	13.033	38.4031	13.4089	5.8267	3.4694
10	54.7252	49.6787	36.4523	92.3631	94.0982	94.5746	97.8023	102.959	95.2962	0.072	0.2337	0.9921	36.69	31.8397	61.8992	45.1263	19.3452	44.1664
32	78.2417	75.3815	71.4412	96.4612	98.2137	100.399	99.1478	97.041	99.8683	4.4439	0.6704	1.1572	73.3216	74.9312	79.341	88.2929	66.898	102.042
100	94.5682	94.3574	87.4501							18.4691	8.8817	6.4277	92.0607	87.8266	95.9302	101.418	93.2106	98.8766
320										37.5515	24.3113	25.3949	93.9871	92.6753	93.1782	97.1376	99.2757	98.8511
1000										70.763	46.1322	46.2204

## Sheet: Panel C Cell binding
	Median cell fluorescence intensity (% max) (n=3)
[Norrin] (nM)	ctrl		Tspan12		Fzd4		Tspan12/Fzd4
	Mean	S.D.	Mean	S.D.	Mean	S.D.	Mean	S.D.
0	2.322	1.3628	1.9	1.013	1.7124	1.0721	1.1792	0.5221
0.03	1.3109	0.6261	1.3067	0.4504	5.106	1.2462	8.7333	3.3263
0.1	0.7138	0.3016	0.3515	0.3372	7.1079	0.7698	14.842	0.7802
0.32	2.4483	1.9038	3.3485	0.5486	16.2805	2.205	31.1984	1.7551
1	3.537	2.48	10.6606	3.986	32.7388	2.1074	53.2586	5.9369
3.2	23.7741	5.0311	70.7159	18.4666	79.2224	4.8881	100	0

## Sheet: Panel D TOPFLASH
	Relative luciferase activity (fold over basal) (n=3)
Norrin (nM)	sirna		0 ng		0.032 ng		0.1 ng		0.32 ng		1 ng
	Mean	SEM	Mean	SEM	Mean	SEM	Mean	SEM	Mean	SEM	Mean	SEM
0	0.9271	0.0614	1	0.0891	1.1009	0.0771	0.8411	0.1858	1.6921	0.133	1.6247	0.6626
0.01	2.371	0.2374	2.4779	0.4357	3.7962	0.7464	4.1536	1.0482	6.3406	1.632	3.2128	0.2792
0.032	2.8716	0.3573	5.6376	1.0695	8.9751	2.064	13.2763	0.1453	14.96	2.0961	10.2095	1.2407
0.1	4.297	0.5782	9.2617	1.4704	13.519	3.2725	21.8916	1.8029	29.2938	2.8043	23.5812	2.6095
0.32	6.339	1.1625	10.9768	1.7155	19.4995	2.6676	21.3636	0.847	35.9375	3.7207	28.5496	0.9196
1	6.099	0.8936	16.9866	3.454	17.8015	2.4182	24.7963	1.0828	32.8586	2.9469	23.0724	3.0406
3.2	5.2737	0.6377	12.2838	0.2546	19.5864	2.9859	21.9474	1.8833	25.0192	2.7719	17.0676	1.191
10	4.1304	0.5856	6.7949	0.6174	8.964	0.8044	13.924	0.9854	20.8974	0.7281	16.5428	1.081
32	1.0798	0.1551	2.3026	0.3395	3.4709	0.5191	3.92	0.2957	5.3961	0.2862	4.8534	0.4275
