# Supplementary material for: The co-receptor Tetraspanin12 directly captures Norrin to promote ligand-specific β-catenin signaling
Source: eLife. 2025 Jan 2;13:RP96743. doi: 10.7554/eLife.96743 (PMC11695057; doi:10.7554/eLife.96743)
Supplement: Figure 5—source data 1. [file elife-96743-fig5-data1.xlsx]

## Sheet: Panel C-D DEP binding
	Steady state binding -- Interference shift (% max)
[DEP] (µM)	apo Fzd4			Fzd4 + Norrin			apo Tspan12/Fzd4			Tspan12/Fzd4 + Norrin
0.01	5.2635	0.6129	2.9614	4.9962	4.1943	6.3542	1.3417	6.0454	4.954	0.5821	2.9119	-1.0956
0.032	16.5773	5.3155	21.0365	25.5179	20.959	11.8899	6.711	13.4415	17.1627	12.5966	21.0302	11.1853
0.1	26.5799	29.3665	43.2351	52.3434	30.2068	21.1071	26.4597	9.5803	25.2709	32.7512	27.1095	28.7082
0.32	56.1631	66.6051	70.8993	75.608	64.2614	58.1909	47.3409	49.7143	68.3929	41.6696	61.9806	62.7315
1	77.0299	79.8432	101.187	99.6944	83.0854	88.3766	76.8214	74.74	88.3944	57.3147	65.6812	80.1772
3.2	99.4577	90.4034	102.969	100.242	94.9963	96.4163	98.0774	98.943	102.888	95.2558	91.0257	100.581
10	95.0371	100.054	97.1003	98.3978	98.0789	96.1391	105.155	93.6618	104.616	100.446	103.929	97.13
32	97.9967	99.0099	87.1446	91.7325	99.5017	92.8449	85.7957	91.7776	81.7856	95.7344	101.373	94.1509

## Sheet: Panel E LRP6 competition
[LRP6 E1E2] (nM)	Remaining Norrin bound (fraction of initial)
0	1.1214	1.0482	1.0242
98	0.8785	0.9517	0.9757
391	0.8757	0.9169	0.8768
1563	0.6357	0.7692	0.7332
6250	0.4678	0.5538	0.4272
25000	0.3392	0.402	0.36
100000	0.1214	0.1784	0.1548

## Sheet: Panel F TOPFLASH
	Relative luciferase activitiy (fold over basal)
[Tspan] (ng/well)	No ligand			1 nM Norrin			Wnt3a CM
0 + siRNA	1.1075	1.3943	1.5411	27.7035	23.897	20.4914	64.9029	66.6502	61.8309
0	0.974	0.9247	1.1011	48.1019	51.6107	51.0067	66.6502	62.4128	66.6502
0.01	1.269	0.9573	1.5246	80.4335	73.7287	74.3463	63.9128	62.3824	58.9022
0.03	2.1478	0.8398	2.2877	127.127	95.783	113.094	61.8746	62.7308	60.2115
0.1	1.6291	1.444	1.5444	146.383	166.842	139.293	58.6424	57.7542	62.0694
0.3	1.2735	1.1791	1.6397	111.491	108.923	80.9621	60.4412	59.8682	61.9078
1	0.9015	1.0706	1.3378	46.1666	49.0158	51.4072	50.0447	56.1794	56.8422
3	0.7218	0.8103	1.0699	15.4408	12.6329	17.1898	18.4604	9.6376	21.6634
