# Supplementary figures and images for: The co-receptor Tetraspanin12 directly captures Norrin to promote ligand-specific β-catenin signaling
Source: eLife journal article supplement (doi:10.7554/elife.96743), 2024-04-22

**figure 1—figure supplement 1E**

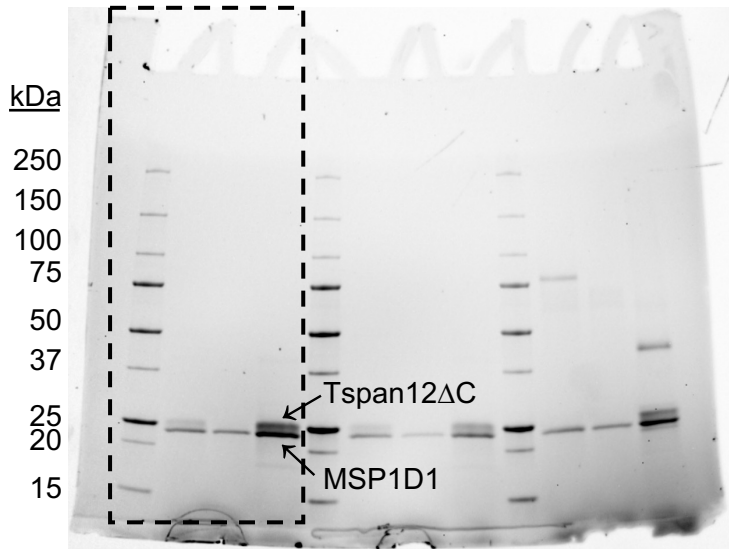

Supplement: fig1-figsupp1-data2 [file elife-96743-fig1-figsupp1-data2-v1.zip]

**figure 1—figure supplement 1C**

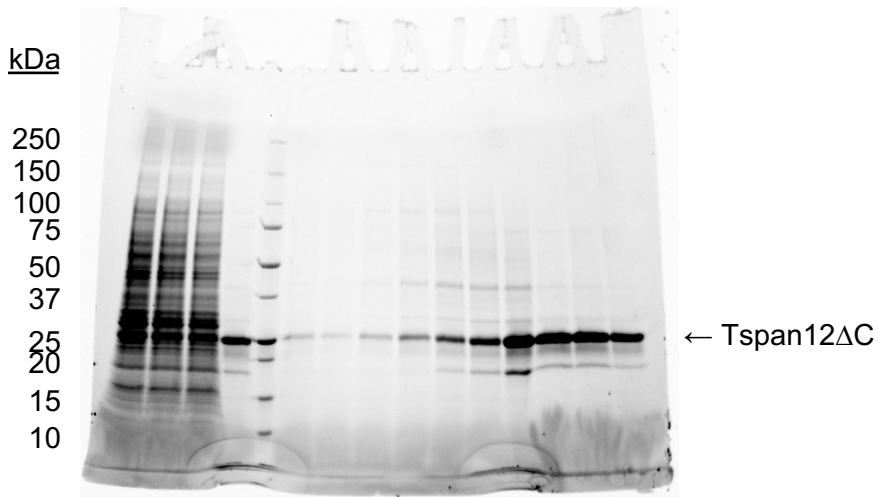

Supplement: fig1-figsupp1-data2 [file elife-96743-fig1-figsupp1-data2-v1.zip]

**figure 2—figure supplement 2A-left**

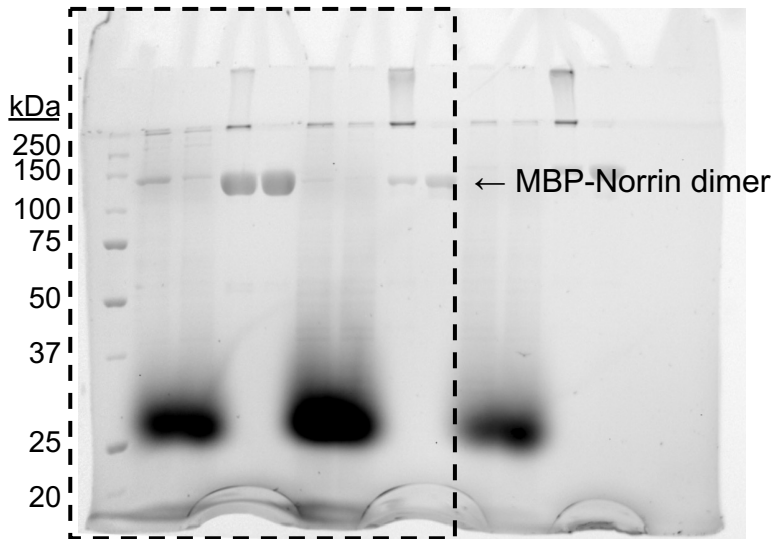

Supplement: fig2-figsupp2-data2 [file elife-96743-fig2-figsupp2-data2-v1.zip]

**figure 2—figure supplement 2B-right**

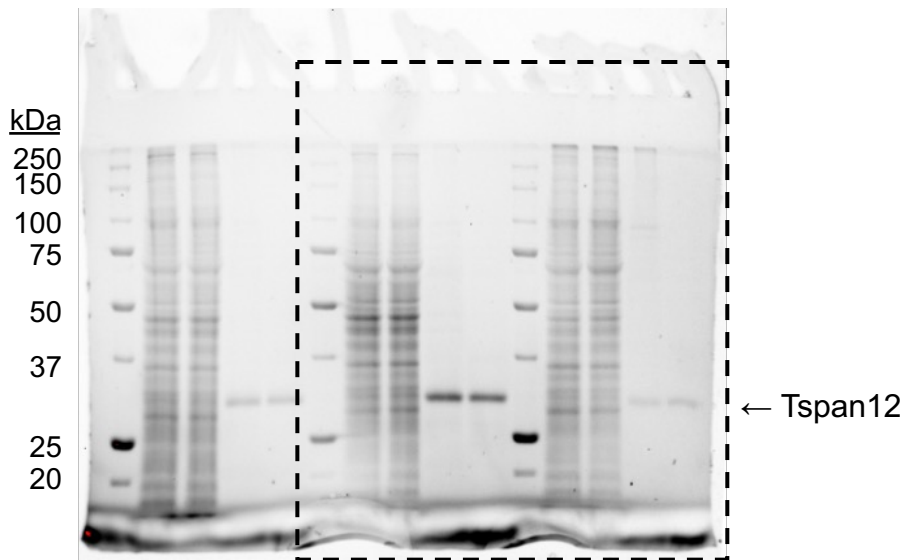

Supplement: fig2-figsupp2-data2 [file elife-96743-fig2-figsupp2-data2-v1.zip]

**figure 2—figure supplement 2B-left**

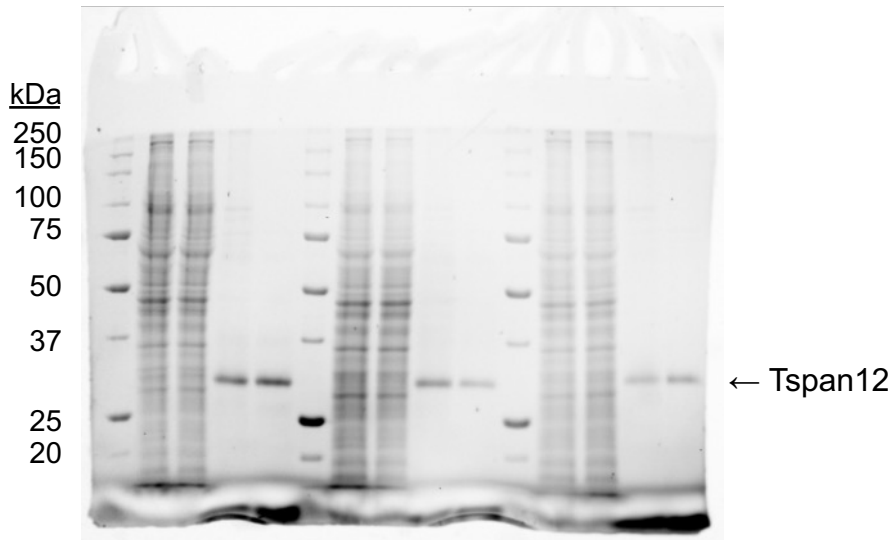

Supplement: fig2-figsupp2-data2 [file elife-96743-fig2-figsupp2-data2-v1.zip]

**figure 2—figure supplement 2A-right**

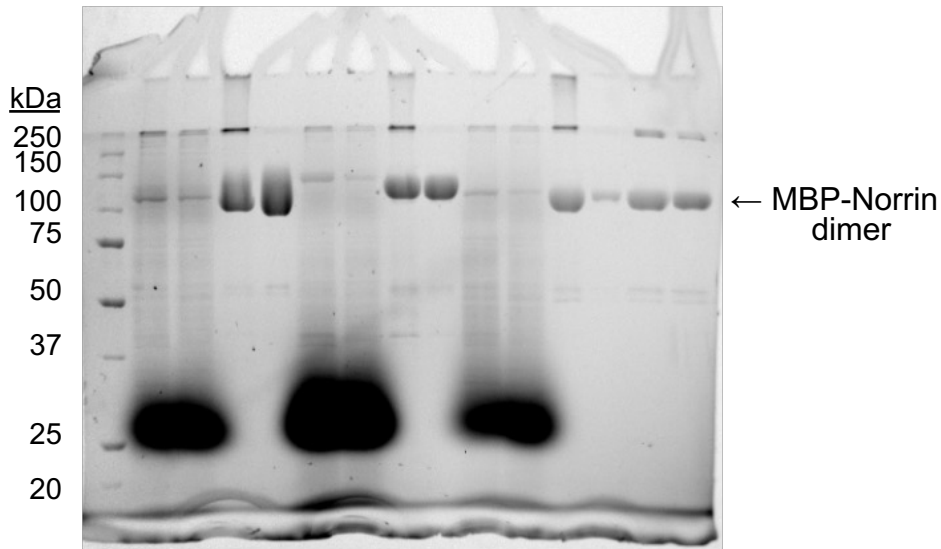

Supplement: fig2-figsupp2-data2 [file elife-96743-fig2-figsupp2-data2-v1.zip]

**figure 3—figure supplement 1B**

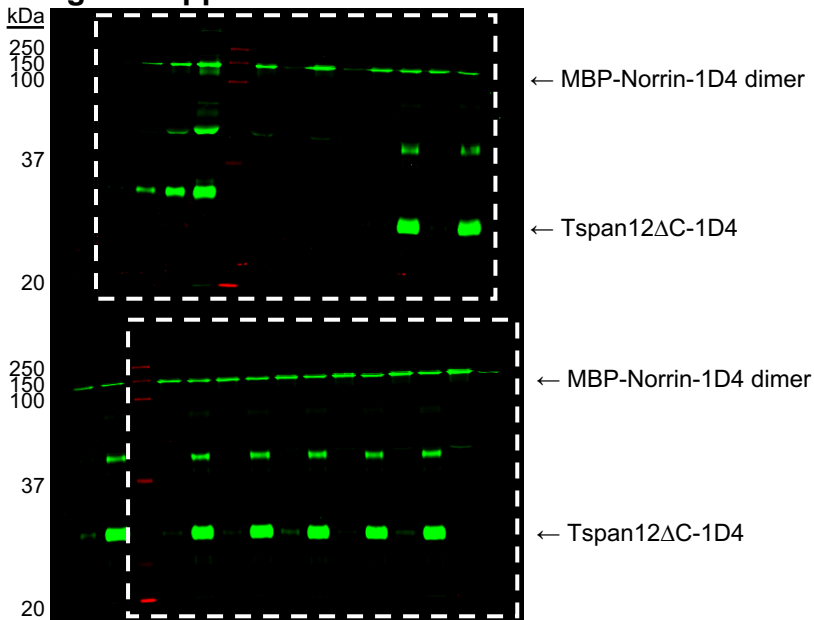

Supplement: fig3-figsupp1-data2 [file elife-96743-fig3-figsupp1-data2-v1.zip]

figure 4—figure supplement 1D-lower

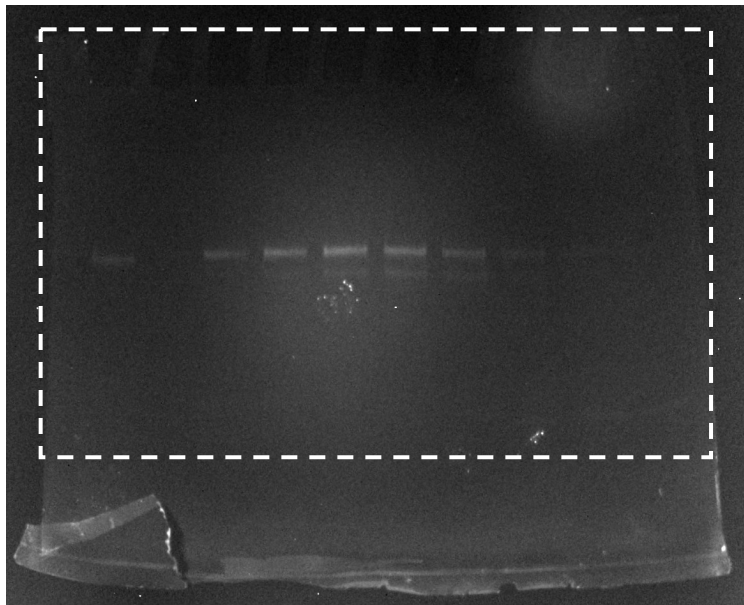

Tspan12/  
← Fzd4-SGFP

Supplement: fig4-figsupp1-data2 [file elife-96743-fig4-figsupp1-data2-v1.zip]

figure 4—figure supplement 1D-upper

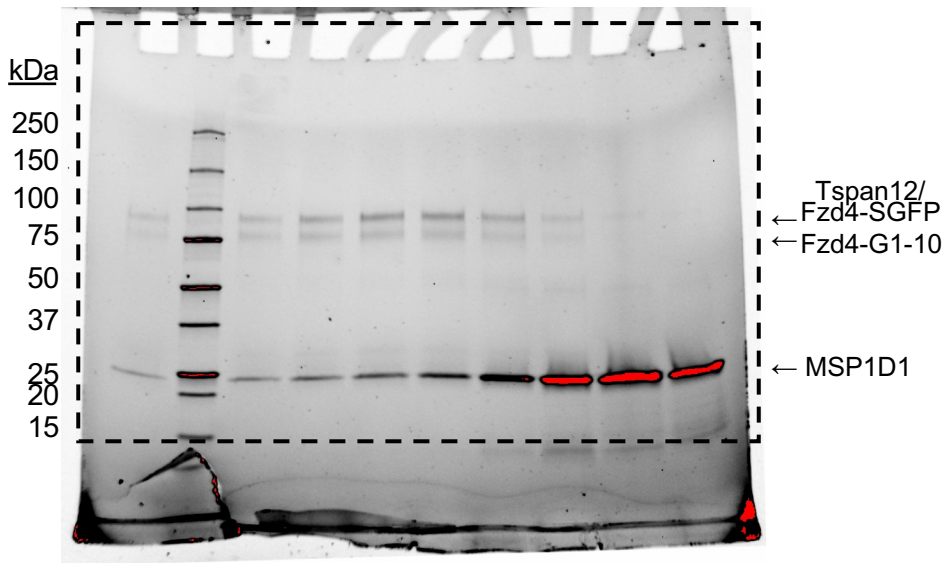

Supplement: fig4-figsupp1-data2 [file elife-96743-fig4-figsupp1-data2-v1.zip]

figure 4—figure supplement 1E

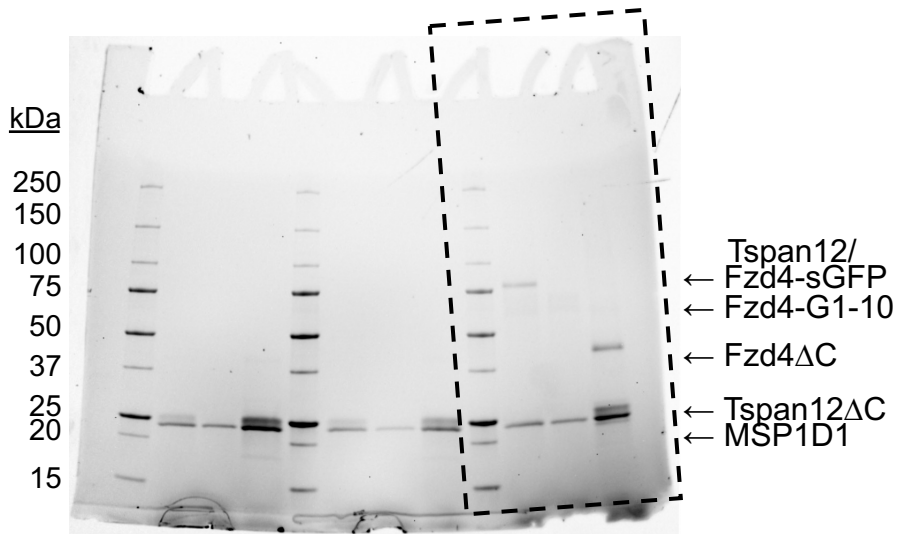

Supplement: fig4-figsupp1-data2 [file elife-96743-fig4-figsupp1-data2-v1.zip]

**figure 4—figure supplement 2C-middle**

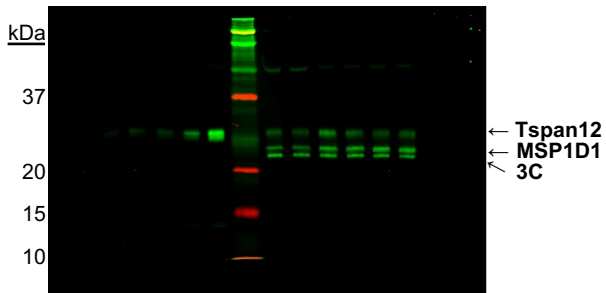

Supplement: fig4-figsupp2-data2 [file elife-96743-fig4-figsupp2-data2-v1.zip]

**figure 4—figure supplement 2B-upper**

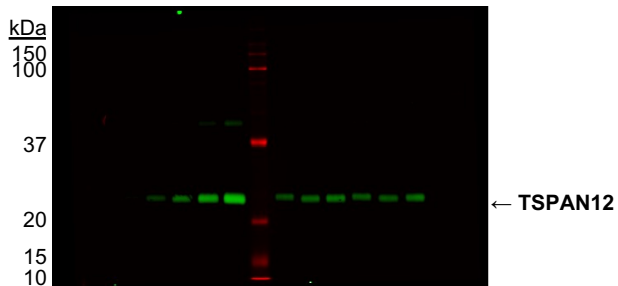

Supplement: fig4-figsupp2-data2 [file elife-96743-fig4-figsupp2-data2-v1.zip]

**figure 4—figure supplement 2C-upper**

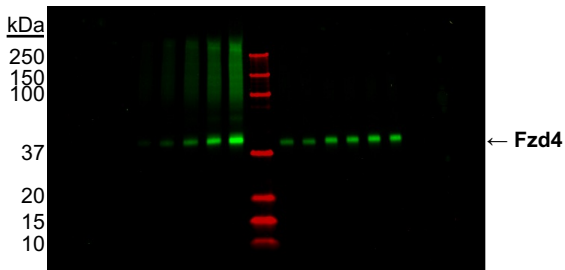

Supplement: fig4-figsupp2-data2 [file elife-96743-fig4-figsupp2-data2-v1.zip]

**figure 4—figure supplement 2C-lower**

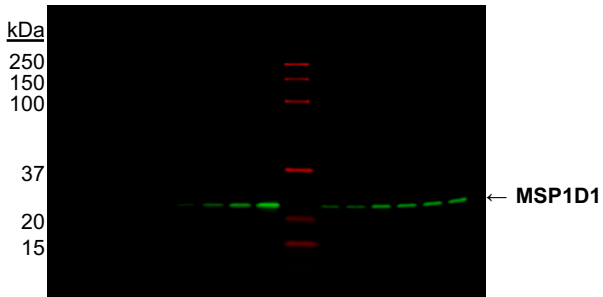

Supplement: fig4-figsupp2-data2 [file elife-96743-fig4-figsupp2-data2-v1.zip]

**figure 4—figure supplement 2B-lower**

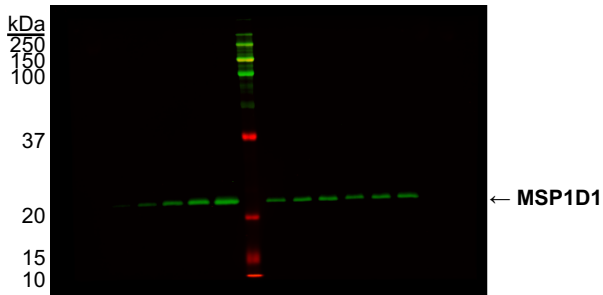

Supplement: fig4-figsupp2-data2 [file elife-96743-fig4-figsupp2-data2-v1.zip]

figure 4—figure supplement 4B

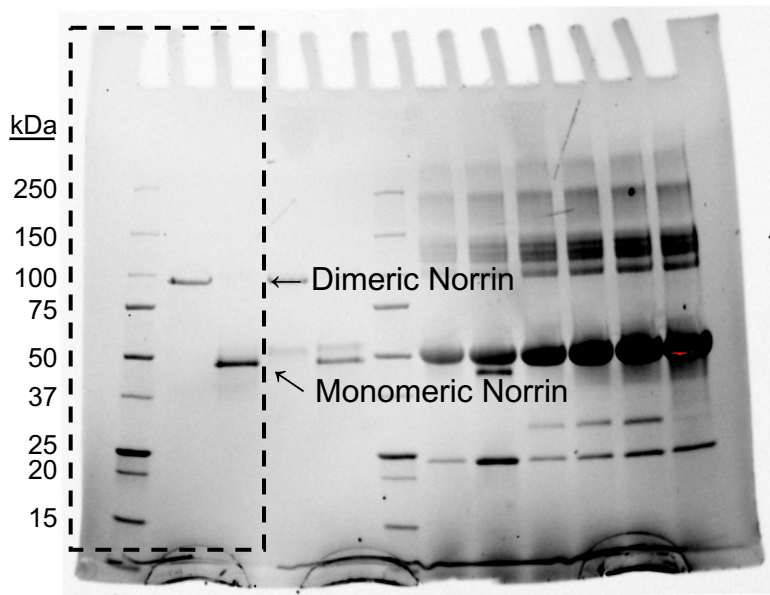

Supplement: fig4-figsupp4-data2 [file elife-96743-fig4-figsupp4-data2-v1.zip]

figure 5—figure supplement 1A

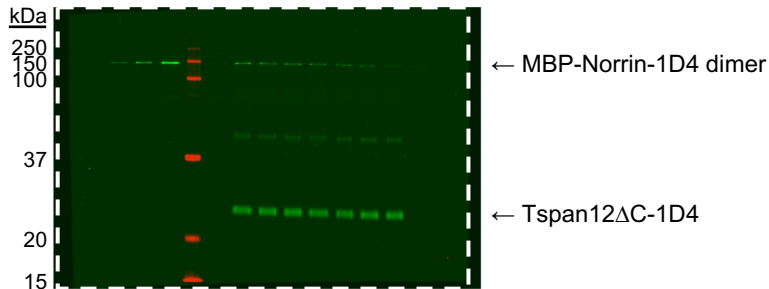

Supplement: fig5-figsupp1-data2 [file elife-96743-fig5-figsupp1-data2-v1.zip]
